# Supplementary material
Source: Springer Nature journal article supplement (https://www.springermedizin.de/resource/supplementary/12936_2012_2429_MOESM2_ESM.pdf/9542942)

Laos PDR

**Veun Sai HC**

**Phnom Dek HC**

**Veal Veng HC**

**Takavit HC**

Gulf of Thailand

Vietnam

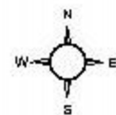

Scale = 1:2,889,077

0 25 50 100 Kilometers

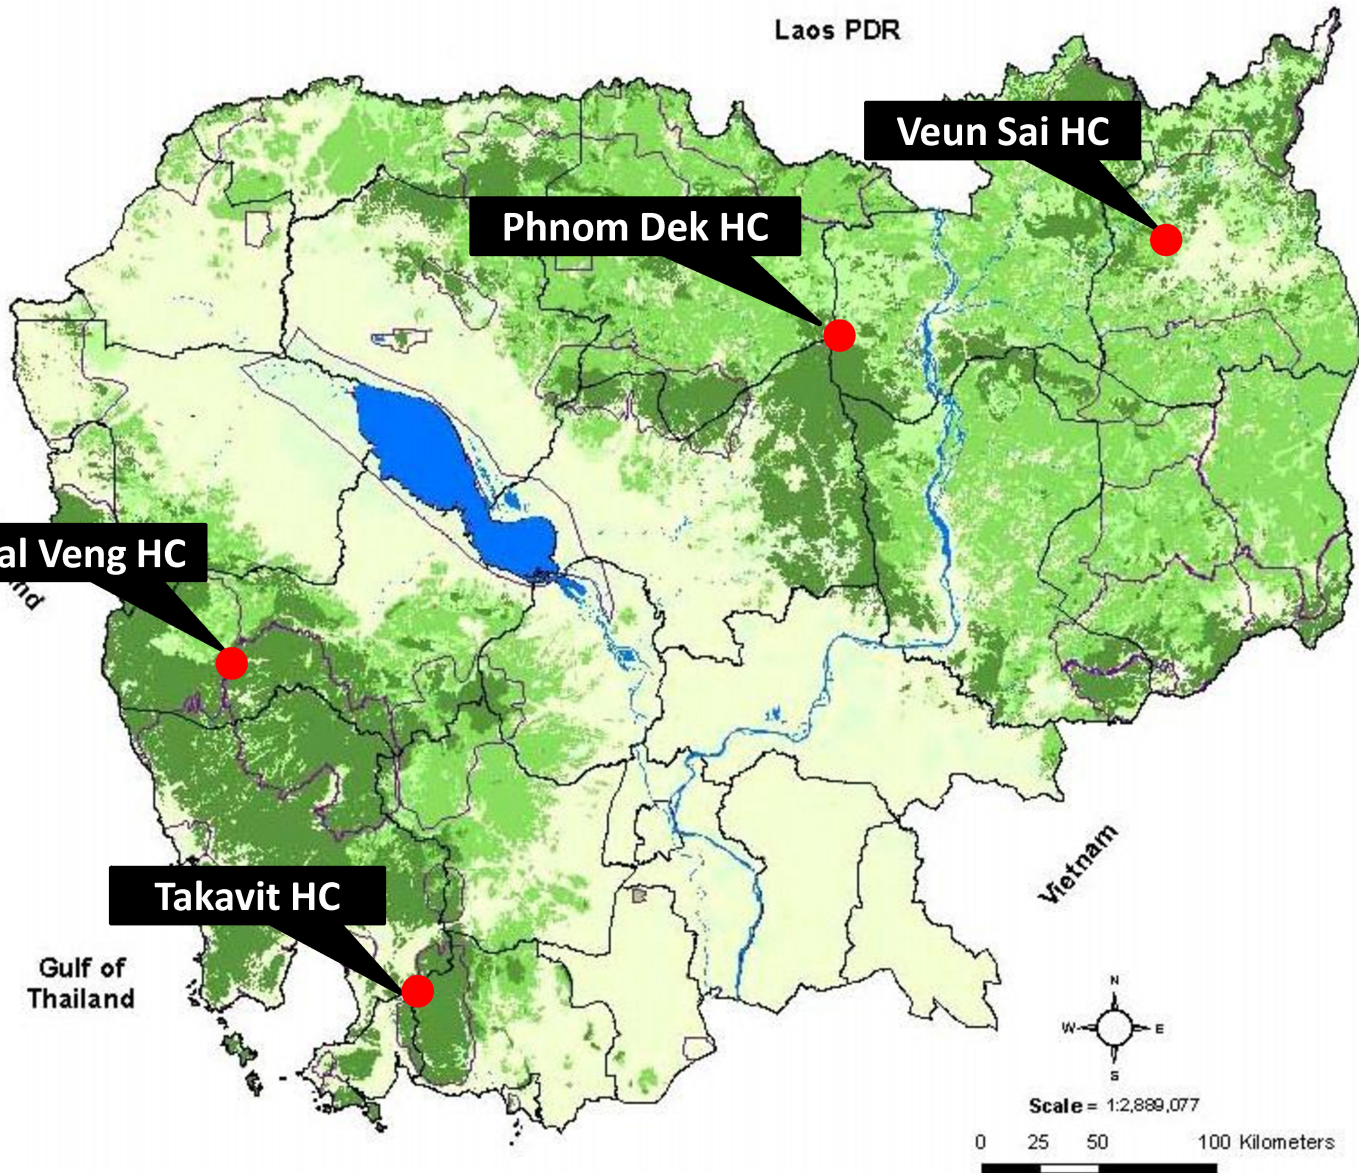

Supplement: MOESM2 [file 9542942]
